# Supplementary material for: Circulating Soluble CD36 is Similar in Type 1 and Type 2 Diabetes Mellitus versus Non-Diabetic Subjects
Source: MDPI journal article supplement (doi:10.3390/jcm8050710), 2019-05-18
Supplement: s1 [file s1]

**Table S1.** Multinomial regression model for circulating sCD36 in the whole study group.

|                         | sCD36 Quartile 2 |             |              | sCD36 Quartile 3 |             |              | sCD36 Quartile 4 |             |                  |
|-------------------------|------------------|-------------|--------------|------------------|-------------|--------------|------------------|-------------|------------------|
|                         | OR               | 95% CI      | <i>p</i>     | OR               | 95% CI      | <i>p</i>     | OR               | 95% CI      | <i>p</i>         |
| Age                     | 0.978            | 0.960–0.995 | <b>0.014</b> | 0.980            | 0.963–0.997 | <b>0.024</b> | 0.967            | 0.950–0.985 | <b>&lt;0.001</b> |
| Sex, female             | 1.172            | 0.775–1.772 | 0.451        | 1.342            | 0.889–2.027 | 0.162        | 1.029            | 0.676–1.566 | 0.894            |
| Hypertension            | 0.809            | 0.514–1.272 | 0.358        | 1.012            | 0.647–1.582 | 0.958        | 0.657            | 0.408–1.060 | 0.085            |
| Tobacco exposure        | 0.736            | 0.498–1.087 | 0.124        | 0.709            | 0.481–1.045 | 0.082        | 0.581            | 0.394–0.857 | <b>0.006</b>     |
| BMI                     | 0.987            | 0.948–1.028 | 0.536        | 0.963            | 0.924–1.004 | 0.074        | 0.970            | 0.930–1.012 | 0.157            |
| ALT                     | 1.008            | 0.998–1.019 | 0.116        | 1.002            | 0.990–1.014 | 0.715        | 0.987            | 0.971–1.003 | 0.110            |
| Type 1 diabetes         | 1.019            | 0.608–1.707 | 0.941        | 0.813            | 0.488–1.354 | 0.427        | 1.174            | 0.720–1.913 | 0.520            |
| Type 2 diabetes         | 2.072            | 1.234–3.477 | <b>0.006</b> | 1.852            | 1.101–3.114 | <b>0.020</b> | 1.925            | 1.109–3.341 | <b>0.020</b>     |
| Systolic blood pressure | 1.002            | 0.990–1.014 | 0.690        | 1.005            | 0.993–1.017 | 0.411        | 1.002            | 0.989–1.014 | 0.787            |
| Triglycerides           | 0.999            | 0.997–1.001 | 0.325        | 0.997            | 0.994–1.00  | 0.057        | 0.999            | 0.997–1.001 | 0.433            |
| LDL cholesterol         | 1.005            | 0.998–1.011 | 0.144        | 0.999            | 0.993–1.006 | 0.917        | 0.997            | 0.991–1.004 | 0.450            |
| Platelets Quartile 2    | 0.915            | 0.549–1.522 | 0.731        | 0.662            | 0.400–1.092 | 0.106        | 1.481            | 0.889–2.469 | 0.132            |
| Platelets Quartile 3    | 1.858            | 1.103–3.127 | <b>0.020</b> | 1.180            | 0.704–1.979 | 0.530        | 2.204            | 1.278–3.802 | <b>0.004</b>     |
| Platelets Quartile 4    | 1.393            | 0.811–2.391 | 0.230        | 1.254            | 0.746–2.108 | 0.392        | 1.738            | 0.991–3.049 | 0.054            |

Significant values are shown in bold. In the multinomial regression model, sCD36 was Ln transformed, and the first quartile was used as the reference. BMI, body mass index; ALT, alanine aminotransferase; LDL, low-density lipoprotein.



**Table S2.** Multinomial regression model for sCD36 in type 1 diabetic group.

|                        | sCD36 Quartile 2 |             |              | sCD36 Quartile 3 |             |              | sCD36 Quartile 4 |             |              |
|------------------------|------------------|-------------|--------------|------------------|-------------|--------------|------------------|-------------|--------------|
|                        | OR               | 95% CI      | <i>p</i>     | OR               | 95% CI      | <i>p</i>     | OR               | 95% CI      | <i>p</i>     |
| Age                    | 0.992            | 0.943–1.043 | 0.757        | 1.035            | 0.985–1.087 | 0.168        | 0.971            | 0.927–1.074 | 0.218        |
| Sex, female            | 1.720            | 0.669–4.426 | 0.260        | 0.782            | 0.299–2.045 | 0.617        | 0.878            | 0.369–2.086 | 0.768        |
| Body mass index        | 1.111            | 0.989–1.248 | 0.076        | 1.125            | 1.003–1.262 | <b>0.044</b> | 1.031            | 0.927–1.148 | 0.571        |
| Triglycerides          | 1.015            | 0.941–1.095 | 0.701        | 0.900            | 0.666–1.214 | 0.489        | 0.899            | 0.666–1.213 | 0.488        |
| Platelets Quartile 2   | 1.635            | 0.484–5.526 | 0.429        | 0.759            | 0.239–2.408 | 0.640        | 2.024            | 0.725–5.651 | 0.178        |
| Platelets Quartile 3   | 1.570            | 0.472–5.223 | 0.462        | 0.759            | 0.231–2.486 | 0.647        | 0.889            | 0.290–2.727 | 0.837        |
| Platelets Quartile 4   | 2.123            | 0.555–8.123 | 0.271        | 1.224            | 0.341–4.397 | 0.756        | 1.310            | 0.376–4.567 | 0.672        |
| Tobacco exposure       | 0.493            | 0.192–1.265 | 0.141        | 0.289            | 0.144–0.731 | <b>0.009</b> | 0.352            | 0.152–0.817 | <b>0.015</b> |
| Antiplatelet treatment | 2.958            | 1.027–8.522 | <b>0.044</b> | 0.614            | 0.199–1.895 | 0.396        | 1.508            | 0.550–4.136 | 0.425        |
| eGFR                   | 0.968            | 0.944–0.993 | <b>0.013</b> | 0.989            | 0.968–1.012 | 0.359        | 0.988            | 0.968–1.007 | 0.228        |
| Total cholesterol      | 0.876            | 0.596–1.286 | 0.498        | 1.676            | 0.374–7.508 | 0.500        | 1.059            | 0.353–7.124 | 0.544        |
| HDL cholesterol        | 1.124            | 0.765–1.652 | 0.551        | 0.606            | 0.135–2.715 | 0.513        | 0.632            | 0.141–2.831 | 0.549        |
| LDL cholesterol        | 1.172            | 0.798–1.723 | 0.418        | 0.608            | 0.136–2.725 | 0.516        | 0.644            | 0.144–2.876 | 0.563        |

Significant values are shown in bold. In the multinomial regression model, sCD36 was Ln transformed, and the first quartile was used as the reference. eGFR; estimated glomerular filtration rate (MDRD4\_IDMS equation).



**Table S3.** Multinomial regression model for sCD36 in type 2 diabetic group.

|                         | sCD36 Quartile 2 |              |              | sCD36 Quartile 3 |              |              | sCD36 Quartile 4 |              |          |
|-------------------------|------------------|--------------|--------------|------------------|--------------|--------------|------------------|--------------|----------|
|                         | OR               | 95% CI       | <i>p</i>     | OR               | 95% CI       | <i>p</i>     | OR               | 95% CI       | <i>p</i> |
| Age                     | 0.966            | 0.928–1.007  | 0.101        | 0.999            | 0.958–1.042  | 0.980        | 0.991            | 0.947–1.037  | 0.687    |
| Sex, female             | 0.753            | 0.322–1.762  | 0.513        | 1.497            | 0.620–3.615  | 0.369        | 1.022            | 0.395–2.637  | 0.965    |
| Platelets Quartile 2    | 1.321            | 0.436–4.002  | 0.622        | 0.971            | 0.299–3.151  | 0.961        | 1.855            | 0.566–6.081  | 0.307    |
| Platelets Quartile 3    | 0.996            | 0.365–2.715  | 0.994        | 0.729            | 0.256–2.081  | 0.555        | 1.119            | 0.357–3.508  | 0.846    |
| Platelets Quartile 4    | 0.953            | 0.310–2.923  | 0.933        | 1.083            | 0.363–2.233  | 0.886        | 1.045            | 0.296–3.695  | 0.945    |
| Antiplatelet treatment  | 2.099            | 0.880–5.009  | 0.945        | 2.694            | 1.126–6.447  | <b>0.026</b> | 1.867            | 0.706–4.439  | 0.208    |
| Total cholesterol       | 1.010            | 0.984–1.036  | 0.471        | 0.971            | 0.936–1.007  | 0.113        | 1.001            | 0.972–1.031  | 0.936    |
| HDL cholesterol         | 1.006            | 0.974–1.038  | 0.715        | 1.022            | 0.984–1.060  | 0.255        | 0.983            | 0.948–1.020  | 0.382    |
| LDL cholesterol         | 0.997            | 0.968–1.026  | 0.824        | 1.031            | 0.990–1.073  | 0.135        | 0.990            | 0.958–1.024  | 0.577    |
| Mean platelet volume    | 0.581            | 0.359–0.940  | <b>0.027</b> | 0.561            | 0.341–0.924  | <b>0.023</b> | 0.668            | 0.388–1.148  | 0.144    |
| Treatment OAD           | 2.899            | 0.854–9.846  | 0.088        | 4.108            | 1.157–11.458 | <b>0.029</b> | 1.956            | 0.483–7.920  | 0.347    |
| Treatment OAD + Insulin | 2.448            | 0.673–8.907  | 0.174        | 2.589            | 0.670–9.998  | 0.167        | 2.607            | 0.600–11.331 | 0.201    |
| Treatment Insulin       | 5.838            | 1.152–29.583 | <b>0.033</b> | 5.068            | 0.930–27.606 | 0.060        | 3.634            | 0.558–23.663 | 0.176    |
| Treatment Other         | 2.006            | 0.478–8.424  | 0.341        | 2.345            | 0.513–10.719 | 0.271        | 4.543            | 0.947–21.795 | 0.058    |

Significant values are shown in bold. In the multinomial regression model, sCD36 was Ln transformed, and the first quartile was used as the reference. OAD, Oral Antidiabetic Agents; HDL, high-density lipoprotein; LDL, low-density lipoprotein.



**Table S4.** Multinomial regression model for sCD36 in the non-diabetic control group.

|                      | sCD36 Quartile 2 |             |                  | sCD36 Quartile 3 |             |                  | sCD36 Quartile 4 |             |                  |
|----------------------|------------------|-------------|------------------|------------------|-------------|------------------|------------------|-------------|------------------|
|                      | OR               | 95% CI      | <i>p</i>         | OR               | 95% CI      | <i>p</i>         | OR               | 95% CI      | <i>p</i>         |
| Age                  | 0.991            | 0.967–1.014 | 0.436            | 0.985            | 0.962–1.008 | 0.201            | 0.975            | 0.952–0.999 | <b>0.039</b>     |
| Sex, female          | 1.081            | 0.528–2.211 | 0.831            | 1.291            | 0.632–2.636 | 0.483            | 1.310            | 0.636–2.694 | 0.463            |
| Hypertension         | 0.568            | 0.269–1.200 | 0.138            | 0.574            | 0.270–1.222 | 0.150            | 0.574            | 0.264–1.245 | 0.160            |
| Dyslipidaemia        | 0.862            | 0.459–1.620 | 0.645            | 0.917            | 0.493–1.704 | 0.784            | 0.830            | 0.435–1.585 | 0.573            |
| Body mass index      | 0.998            | 0.935–1.067 | 0.966            | 0.957            | 0.893–1.025 | 0.212            | 0.984            | 0.921–1.052 | 0.642            |
| Triglycerides        | 0.996            | 0.992–1.000 | 0.081            | 0.997            | 0.993–1.001 | 0.150            | 0.994            | 0.989–0.999 | <b>0.019</b>     |
| HbA1c                | 0.243            | 0.112–0.523 | <b>&lt;0.001</b> | 0.260            | 0.121–0.557 | <b>&lt;0.001</b> | 0.299            | 0.138–0.648 | <b>0.002</b>     |
| Platelets Quartile 2 | 0.653            | 0.302–1.409 | 0.277            | 0.443            | 0.212–0.927 | <b>0.031</b>     | 1.136            | 0.501–2.573 | 0.760            |
| Platelets Quartile 3 | 2.414            | 1.094–5.322 | <b>0.029</b>     | 1.475            | 0.685–3.174 | 0.320            | 4.318            | 1.855–10.05 | <b>&lt;0.001</b> |
| Platelets Quartile 4 | 1.497            | 0.669–3.350 | 0.326            | 1.029            | 0.476–2.224 | 0.942            | 2.635            | 1.120–6.197 | <b>0.026</b>     |
| Haematocrit          | 0.948            | 0.856–1.049 | 0.299            | 0.972            | 0.879–1.075 | 0.586            | 1.006            | 0.909–1.114 | 0.904            |

Significant values are shown in bold. In the multinomial regression model, sCD36 was Ln transformed, and the first quartile was used as the reference. HbA1c, glycated haemoglobin.



**Table S5.** Comparison of pre-analytical conditions of sCD36.

|                        | Centrifugation 3000× g |                     | Centrifugation 1850× g |                     | Centrifugation 1500× g |                     |
|------------------------|------------------------|---------------------|------------------------|---------------------|------------------------|---------------------|
|                        | 1 Freeze-Thaw Cycle    | 3 Freeze-Thaw Cycle | 1 Freeze-Thaw Cycle    | 3 Freeze-Thaw Cycle | 1 Freeze-Thaw Cycle    | 3 Freeze-Thaw Cycle |
| Centrifugation 3000× g |                        |                     |                        |                     |                        |                     |
| 1 freeze-thaw cycle    | 1                      | 0.974 <sup>1</sup>  | 0.997 <sup>1</sup>     | 0.945 <sup>1</sup>  | 0.998 <sup>1</sup>     | 0.983 <sup>1</sup>  |
| 3 freeze-thaw cycle    |                        | 1                   | 0.969 <sup>1</sup>     | 0.914 <sup>1</sup>  | 0.973 <sup>1</sup>     | 0.974 <sup>1</sup>  |
| Centrifugation 1850× g |                        |                     |                        |                     |                        |                     |
| 1 freeze-thaw cycle    |                        |                     | 1                      | 0.927 <sup>1</sup>  | 0.999 <sup>1</sup>     | 0.980 <sup>1</sup>  |
| 3 freeze-thaw cycle    |                        |                     |                        | 1                   | 0.933 <sup>1</sup>     | 0.954 <sup>1</sup>  |
| Centrifugation 1500× g |                        |                     |                        |                     |                        |                     |
| 1 freeze-thaw cycle    |                        |                     |                        |                     | 1                      | 0.983 <sup>1</sup>  |
| 3 freeze-thaw cycle    |                        |                     |                        |                     |                        | 1                   |

<sup>1</sup> Pearson's correlation is significant at the 0.01 level (2-tailed). Pearson correlation coefficients between pre-analytical steps, measured within each assay. Correlation between plasma prepared at 3000× g, 1850× g and 1500× g centrifugation, everyone with the correlation between plasma treated by 1 and 3 freeze-thaw cycles.



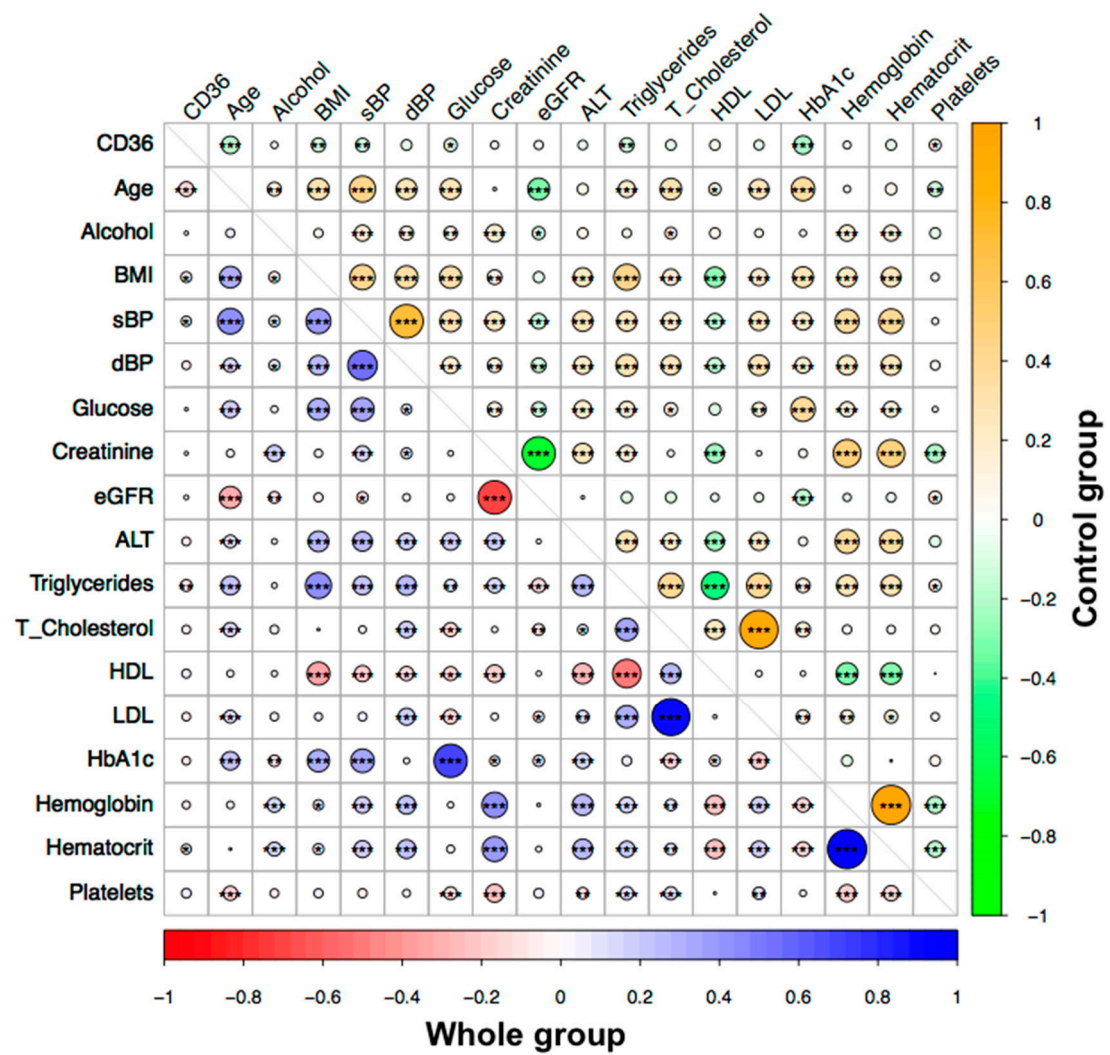

**Figure S1.** Correlation analysis of circulating sCD36 and clinical variables in whole (red-blue) and non-diabetic subject (green-orange) groups. Spearman's correlation is significant at the 0.05 \*, 0.01 \*\* and 0.001\*\*\* levels (2-tailed). BMI, body mass index; sBP, systolic blood pressure; dBP, diastolic blood pressure; eGFR, estimated glomerular filtration rate (MDRD4\_IDMS equation); ALT, alanine aminotransferase; HDL, high-density lipoprotein; LDL, low-density lipoprotein.



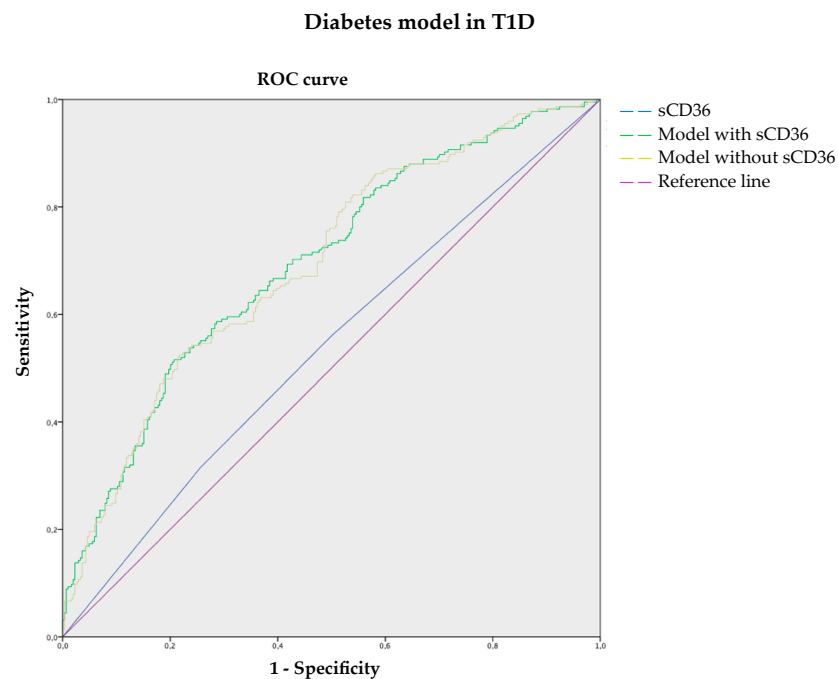

| Test Results Variables | Area  | Std. Error | Asymptotic Sig. | Asymptotic 95% Confidence Interval |             |
|------------------------|-------|------------|-----------------|------------------------------------|-------------|
|                        |       |            |                 | Lower Bound                        | Upper Bound |
| sCD36                  | 0.537 | 0.025      | 143             | 0.488                              | 0.587       |
| Model with sCD36       | 0.695 | 0.023      | 0               | 0.650                              | 0.740       |
| Model without sCD36    | 0.694 | 0.023      | 0               | 0.649                              | 0.739       |

(a)

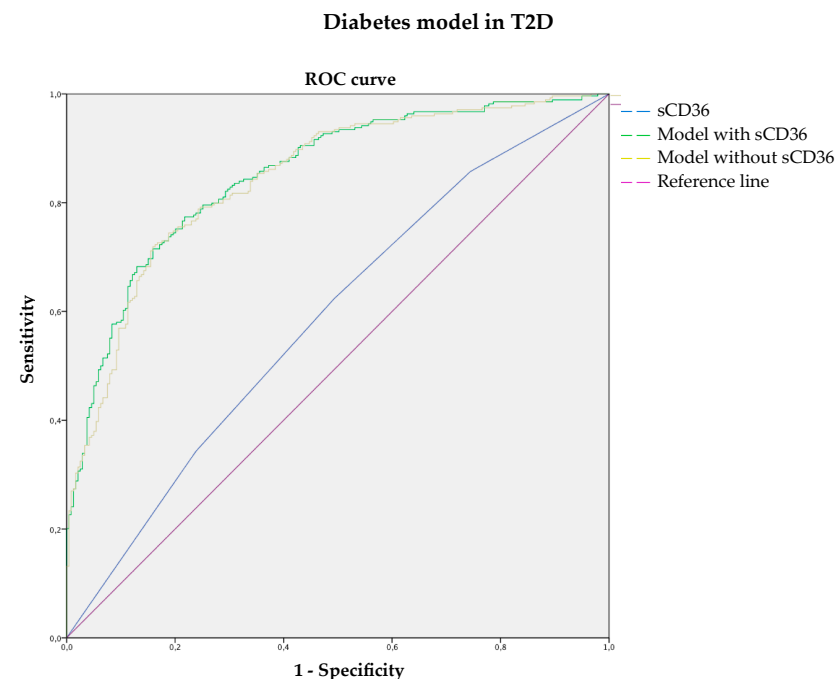

| Test Results Variables | Area  | Std. Error | Asymptotic Sig. | Asymptotic 95% Confidence Interval |             |
|------------------------|-------|------------|-----------------|------------------------------------|-------------|
|                        |       |            |                 | Lower Bound                        | Upper Bound |
| sCD36                  | 0.587 | 0.025      | 0.001           | 0.538                              | 0.637       |
| Model with sCD36       | 0.851 | 0.017      | 0               | 0.819                              | 0.884       |
| Model without sCD36    | 0.844 | 0.017      | 0               | 0.811                              | 0.878       |

(b)

**Figure S2.** Receiver operating characteristics (ROC) curve showing the relationship between sensitivity and 1-specificity in determining the discriminatory ability of the logistic regression model with and without sCD36 as predictor. (a) T1D versus non-diabetic group, and (b) T2D versus non-diabetic group.



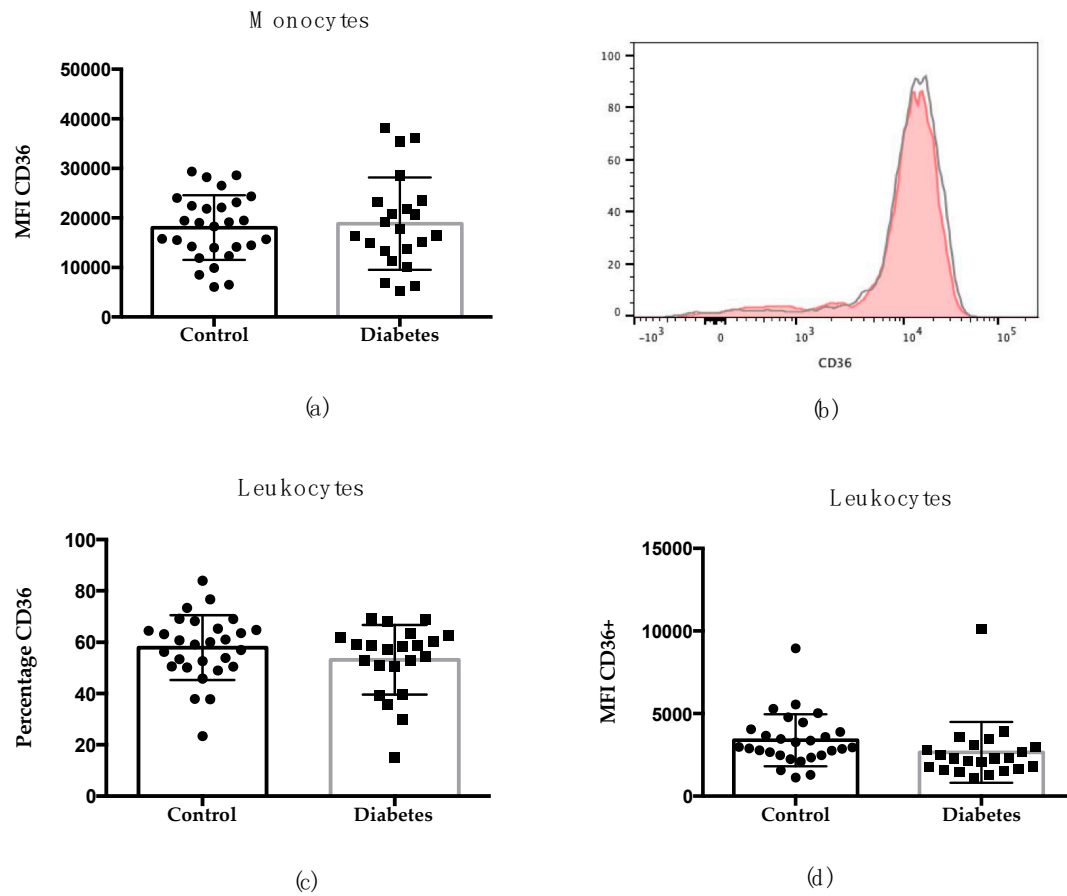

**Figure S3.** Ex vivo flow cytometric analysis of CD36 from type 2 diabetic patients and non-diabetic subjects. **(a)** CD36 median fluorescence intensity (MFI) in monocyte population. **(b)** Relative cells number CD36+ in non-diabetic subjects (in grey) and in T2D subjects (in red). **(c)** Abundance of CD36+ leukocyte population. **(d)** CD36 median fluorescence intensity (MFI) in leukocyte population.



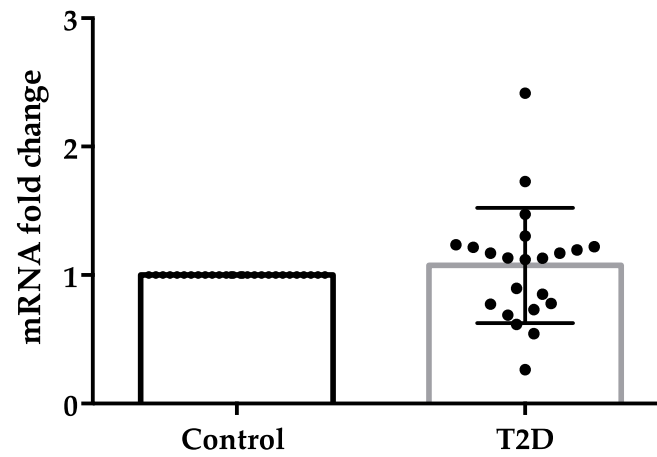

**Figure S4.** CD36 mRNA expression was not different between T2D and non-diabetic controls. CD36 mRNA expression was analysed by real-time PCR and normalised to GAPDH. The data show the mean of fold change relative control group from the analyses' subjects. Mann-Whitney test  $p = 0.232$ .
